# Supplementary material for: Regio-regular alternating diketopyrrolopyrrole-based D1–A–D2–A terpolymers for the enhanced performance of polymer solar cells
Source: Royal Society of Chemistry journal article supplement (doi:10.1039/c9ra08858j), 2019-01-01
Supplement: c9ra08858j1.pdf [file c9ra08858j1.pdf]

## **ELECTRONIC SUPPLEMENTARY INFORMATION**

### **Regio-regular    Alternating    Diketopyrrolopyrrole-based    D<sub>1</sub>-A-D<sub>2</sub>-A Terpolymers for the Enhanced Performance of Polymer Solar Cells**

Myeongjae Lee,<sup>#a</sup> Taehyo Kim,<sup>#b</sup> Hoai Van T. Nguyen,<sup>c</sup> Hye Won Cho,<sup>b</sup> Kyung-Koo Lee,<sup>c</sup>  
Jong-Ho Choi,<sup>a</sup> BongSoo Kim,<sup>\*d</sup> and Jin Young Kim<sup>\*b</sup>

<sup>a</sup>Department of Chemistry, Korea University, 145 Anam-ro, Seongbuk-gu, Seoul 02841,  
Republic of Korea

<sup>b</sup>School of Energy and Chemical Engineering, Ulsan National Institute of Science and  
Technology (UNIST), 50 UNIST-gil, Ulsan 44919, Republic of Korea

<sup>c</sup>Department of Chemistry, Kunsan National University, 558 Daehak-ro, Gunsan-si, Jeollabuk-  
do 54150, Republic of Korea

<sup>d</sup>Department of Chemistry, Ulsan National Institute of Science and Technology (UNIST), 50  
UNIST-gil, Ulsan 44919, Republic of Korea

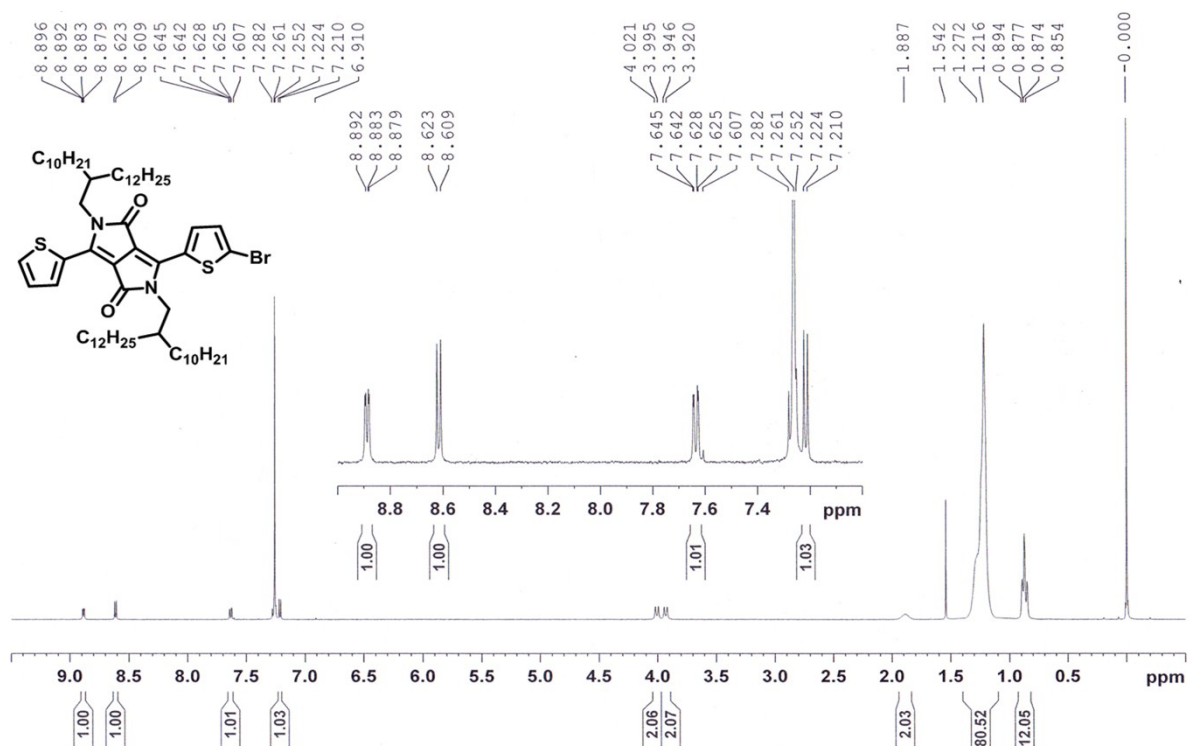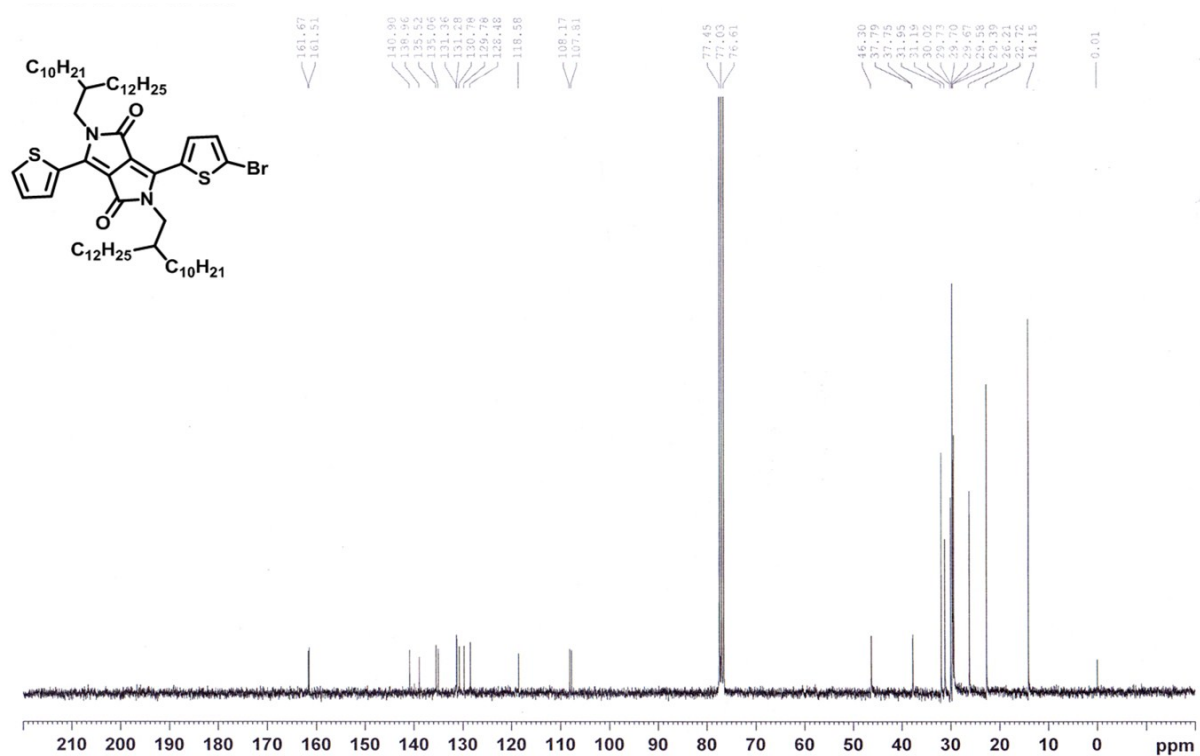

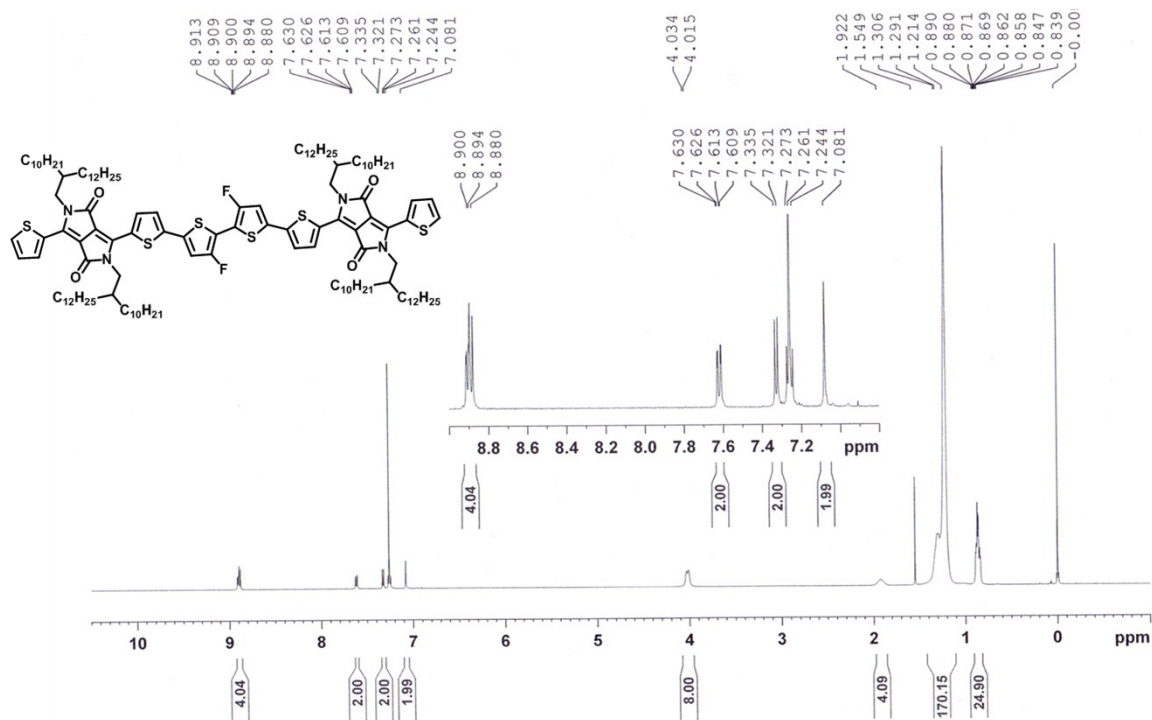

**Figure S3.** <sup>1</sup>H-NMR spectrum of DPPF2T2DPP

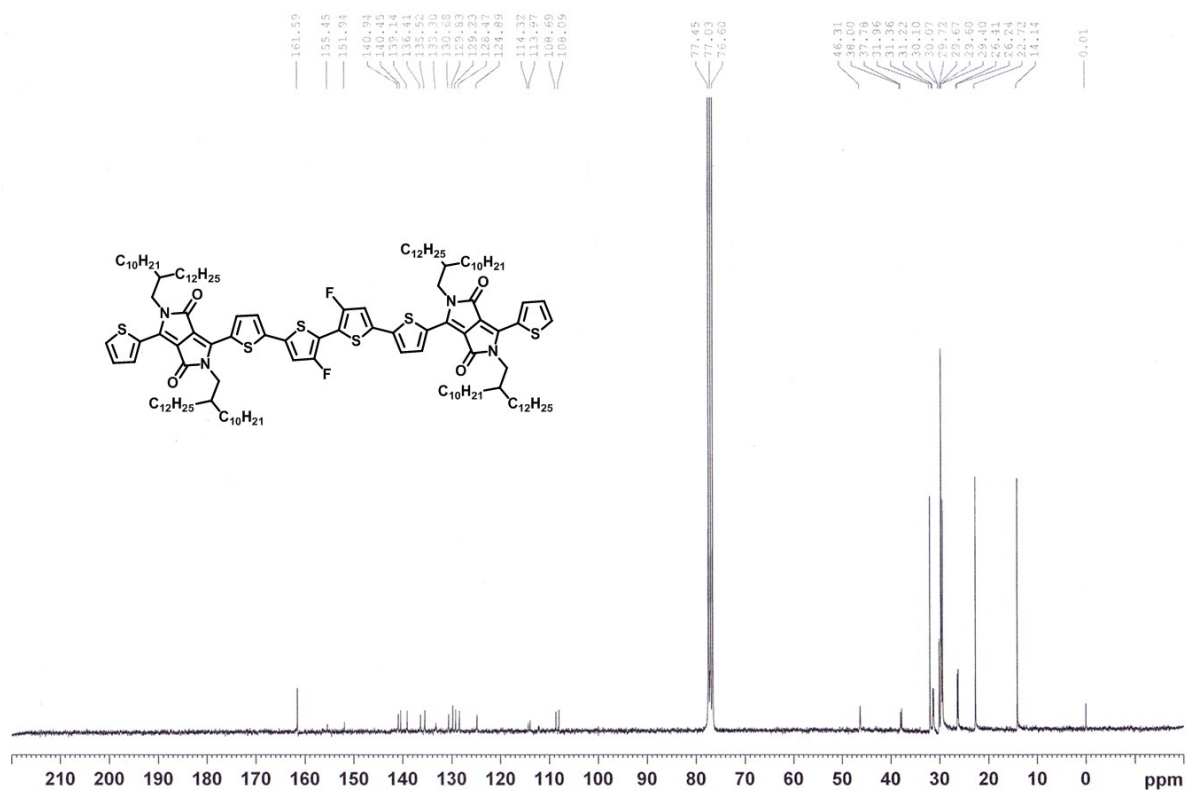

**Figure S4.** <sup>13</sup>C-NMR spectrum of DPPF2T2DPP

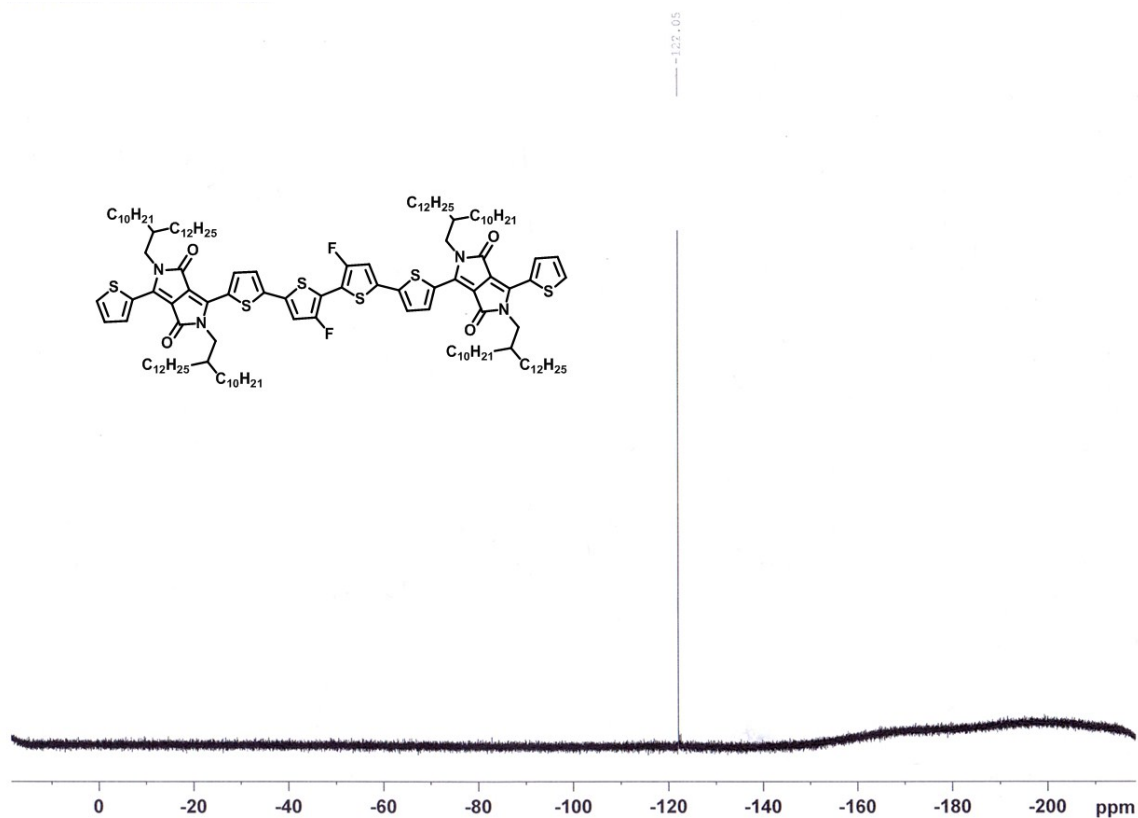

**Figure S5.**  $^{19}\text{F}$ -NMR spectrum of DPPF2T2DPP

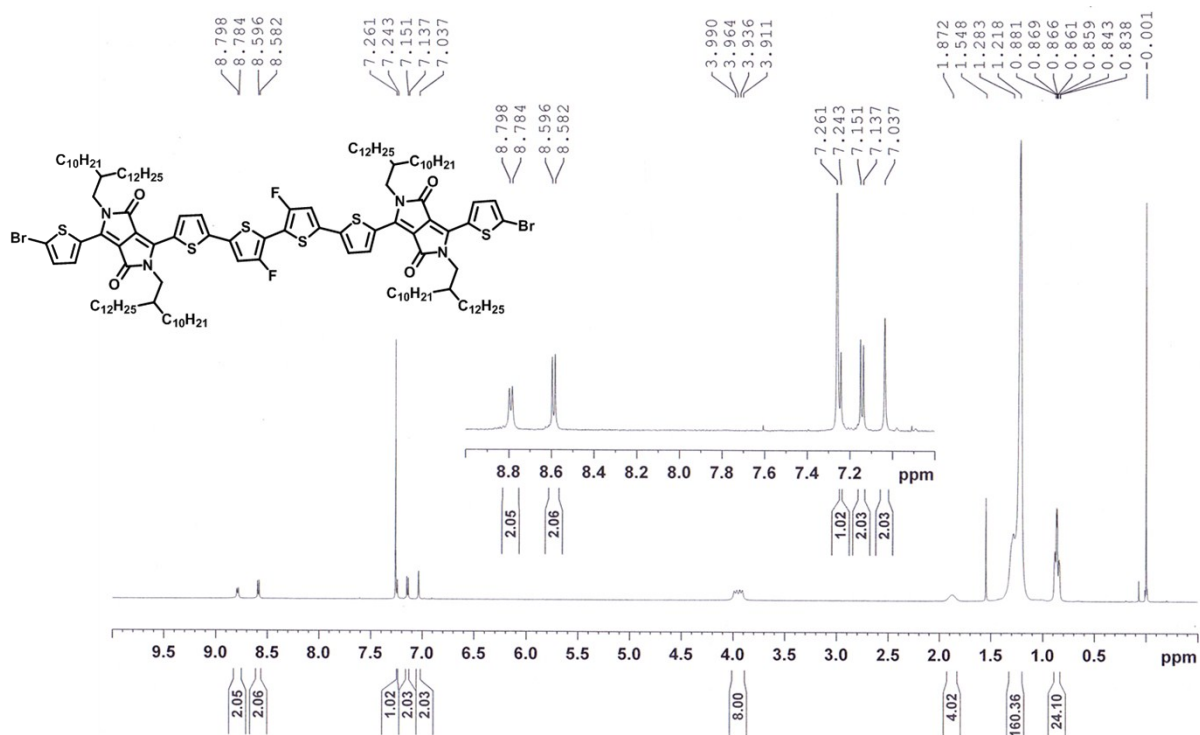

**Figure S6.**  $^1\text{H}$ -NMR spectrum of Br-DPPF2T2DPP-Br

20170505 Br-DPPF2T2DPP-Br 13C

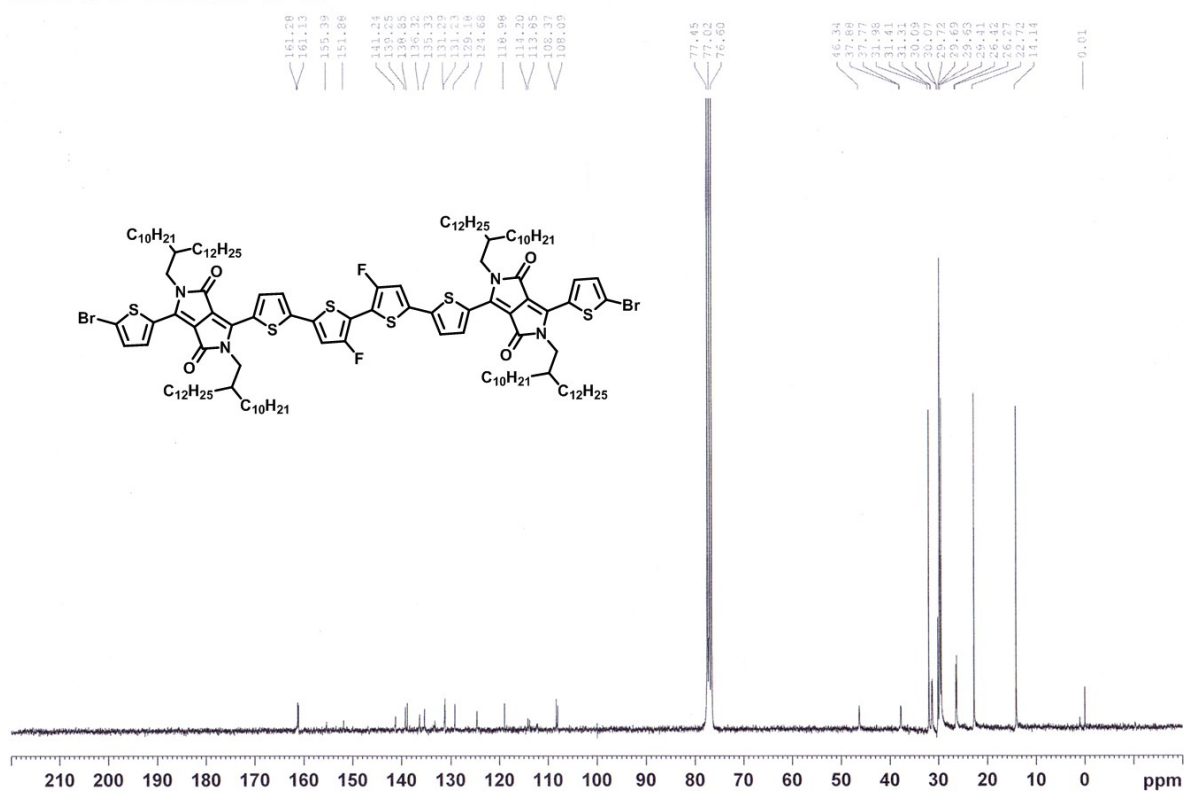

Figure S7. <sup>13</sup>C-NMR spectrum of Br-DPPF2T2DPP-Br

20170502 Br-DPPF2T2DPP-Br 19F

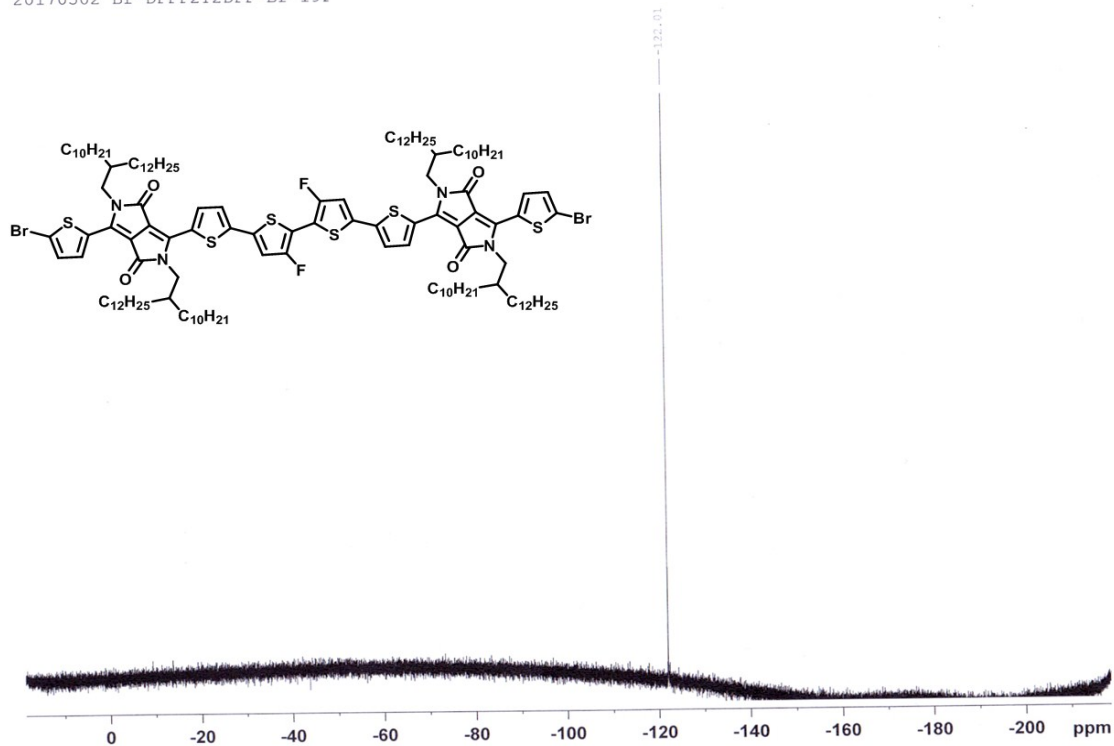

Figure S8. <sup>19</sup>F-NMR spectrum of Br-DPPF2T2DPP-Br

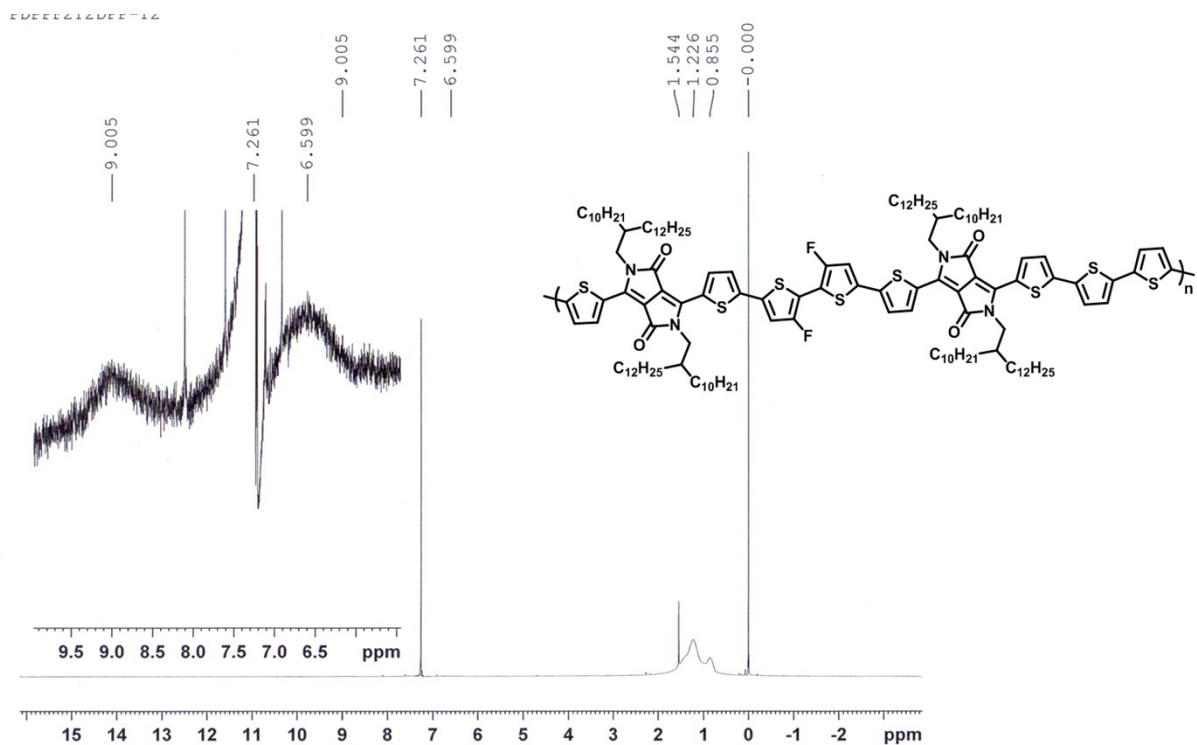

**Figure S9.**  $^1\text{H}$ -NMR spectrum of PDPPF2T2DPP-T2

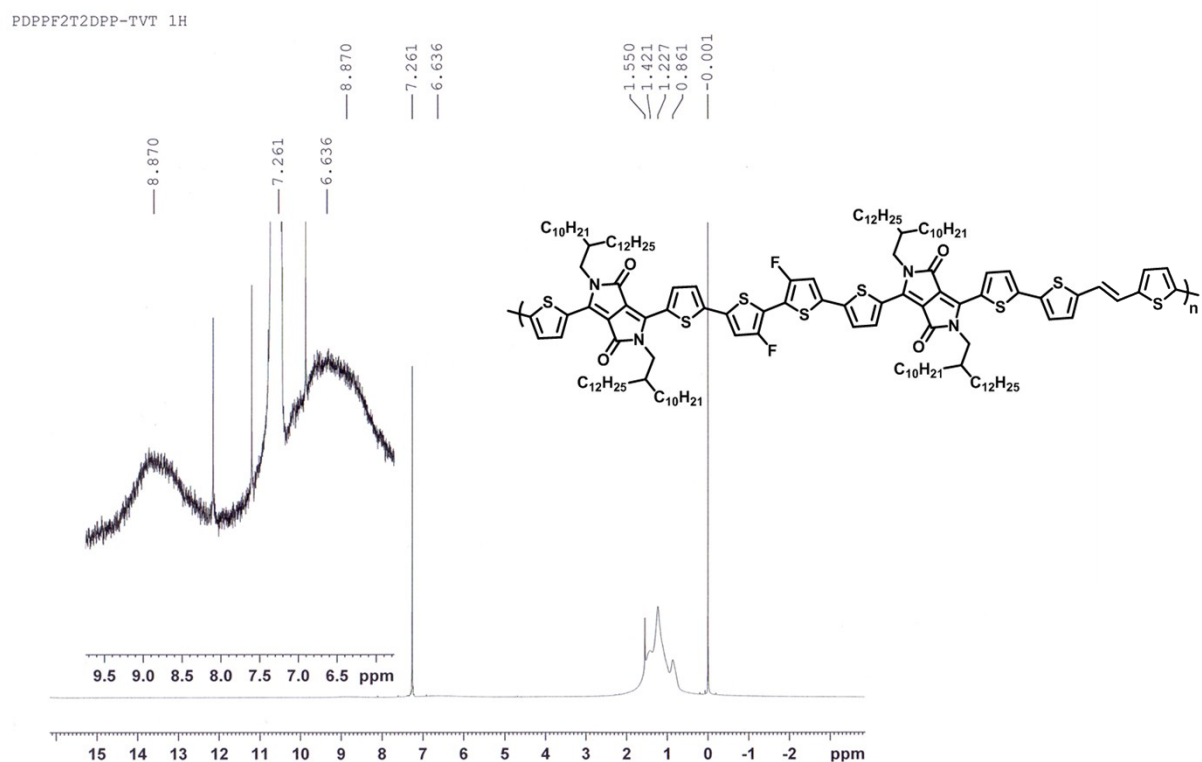

**Figure S10.**  $^1\text{H}$ -NMR spectrum of PDPPF2T2DPP-TVT

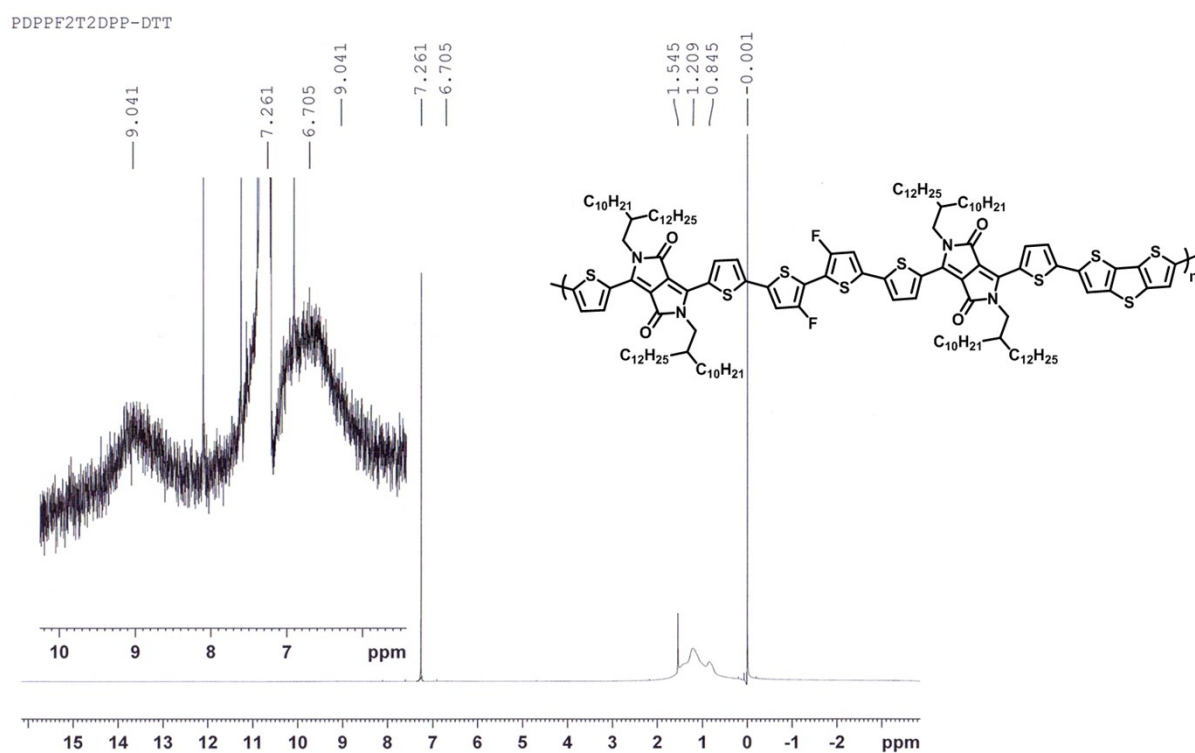

**Figure S11.** <sup>1</sup>H-NMR spectrum of PDPPF2T2DPP-DTT

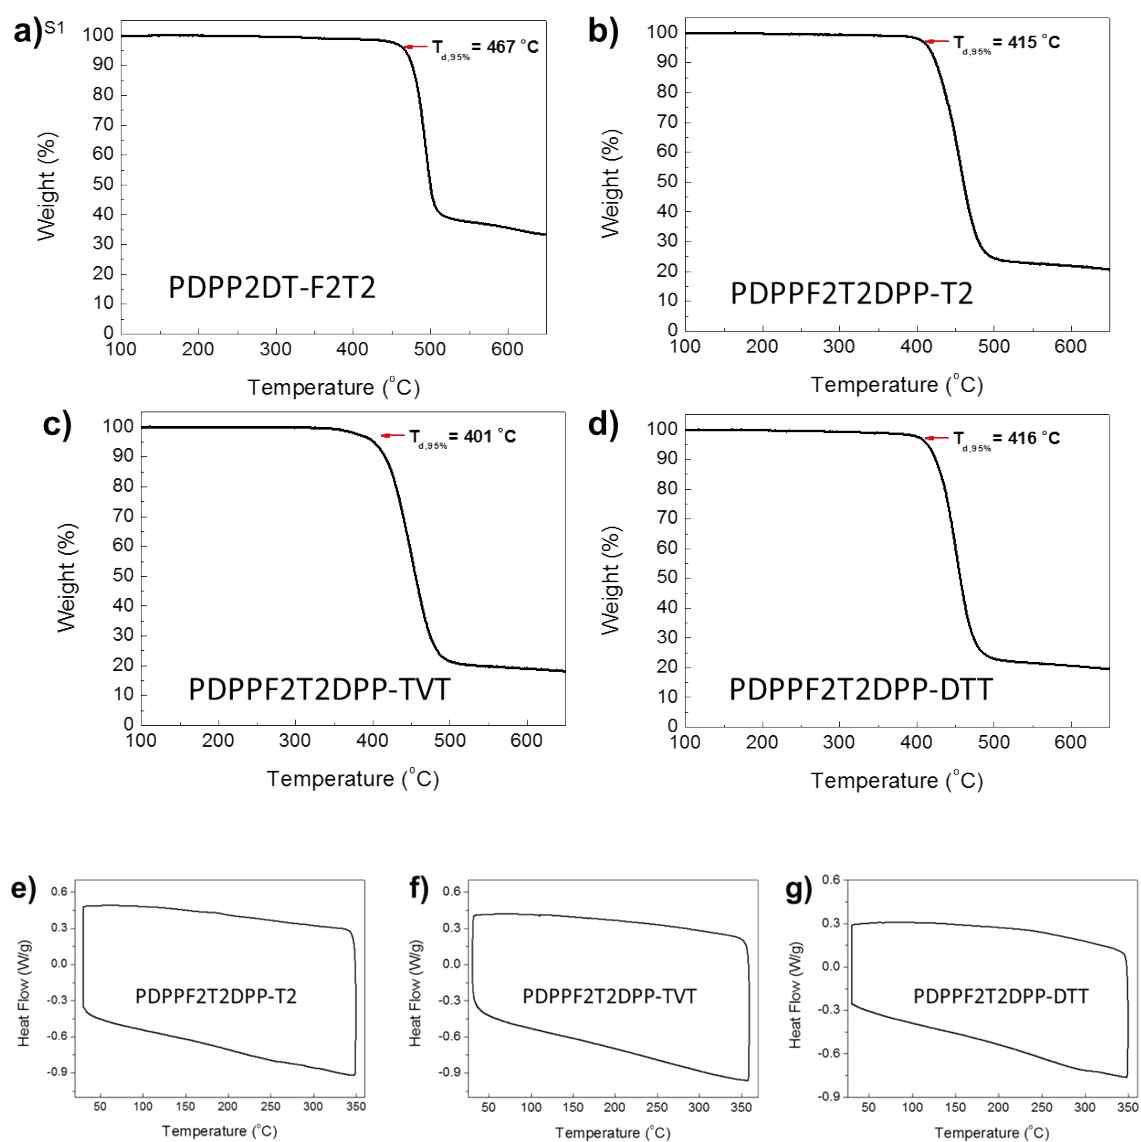

**Figure S12.** (a-d) TGA and (e-g) DSC curves of the DPP-polymers in this study.



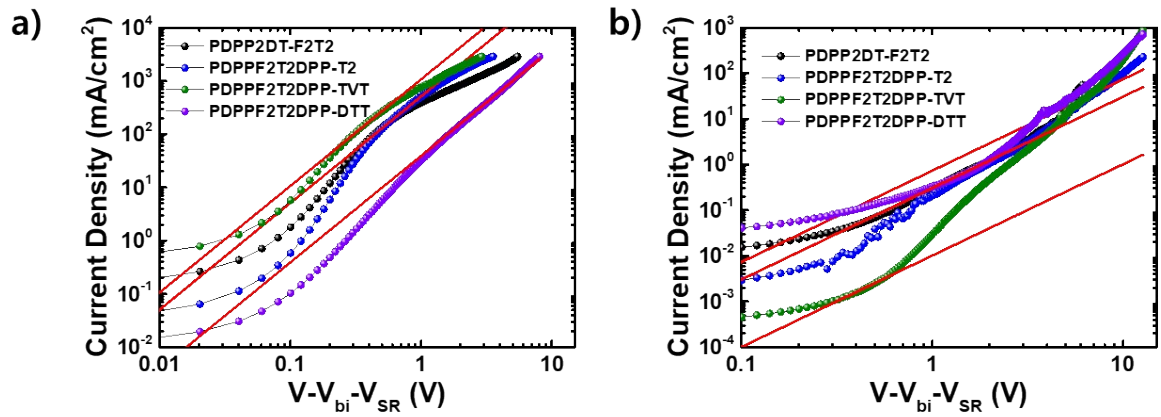

**Figure S13.** Measured  $J$ - $V$  characteristics with red lines fitted by SCLC model for (a) hole-only devices and (b) electron-only devices containing the pristine polymer films.

**Table S1** Hole and electron mobilities of polymer films, estimated using the SCLC method

| Polymer         | $\mu_h$<br>[cm <sup>2</sup> s <sup>-1</sup> V <sup>-1</sup> ] | $\mu_e$<br>[cm <sup>2</sup> s <sup>-1</sup> V <sup>-1</sup> ] |
|-----------------|---------------------------------------------------------------|---------------------------------------------------------------|
| PDPP2DT-F2T2    | $1.56 \times 10^{-3}$                                         | $4.39 \times 10^{-8}$                                         |
| PDPPF2T2DPP-T2  | $1.69 \times 10^{-3}$                                         | $1.35 \times 10^{-7}$                                         |
| PDPPF2T2DPP-TVT | $1.18 \times 10^{-3}$                                         | $3.10 \times 10^{-9}$                                         |
| PDPPF2T2DPP-DTT | $2.46 \times 10^{-3}$                                         | $7.00 \times 10^{-7}$                                         |

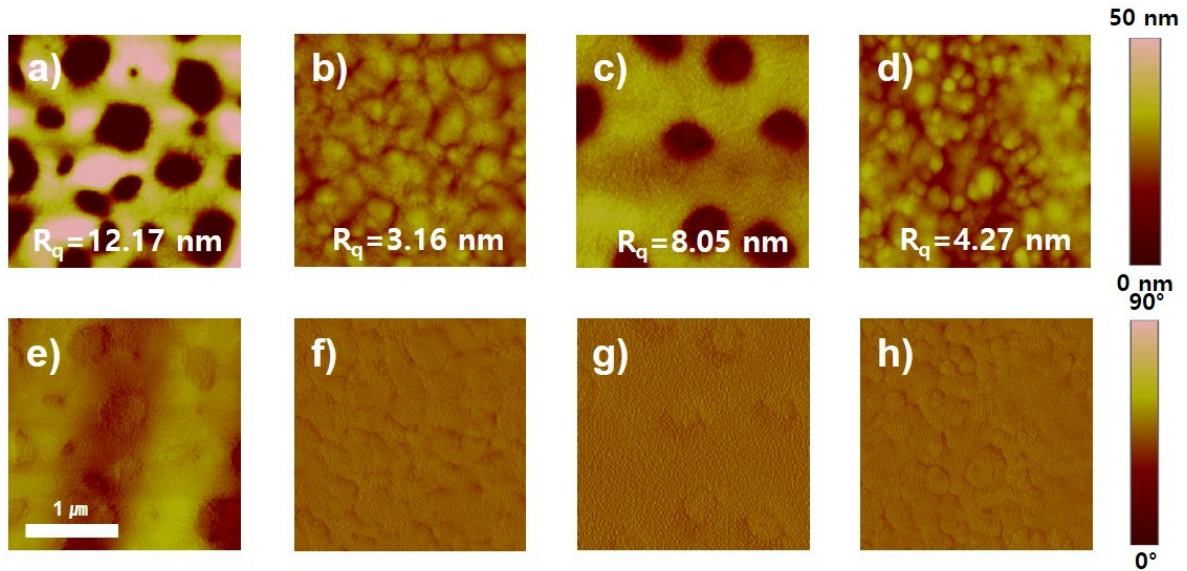

**Figure S14.** Surface morphology of polymer:PC<sub>71</sub>BM films without DPE additives. AFM (a–d) topographic and (e–h) phase images: (a,e) PDPP2DT-F2T2, (b,f) PDPPF2T2DPP-T2, (c,g) PDPPF2T2DPP-TVT, and (d,h) PDPPF2T2DPP-DTT.

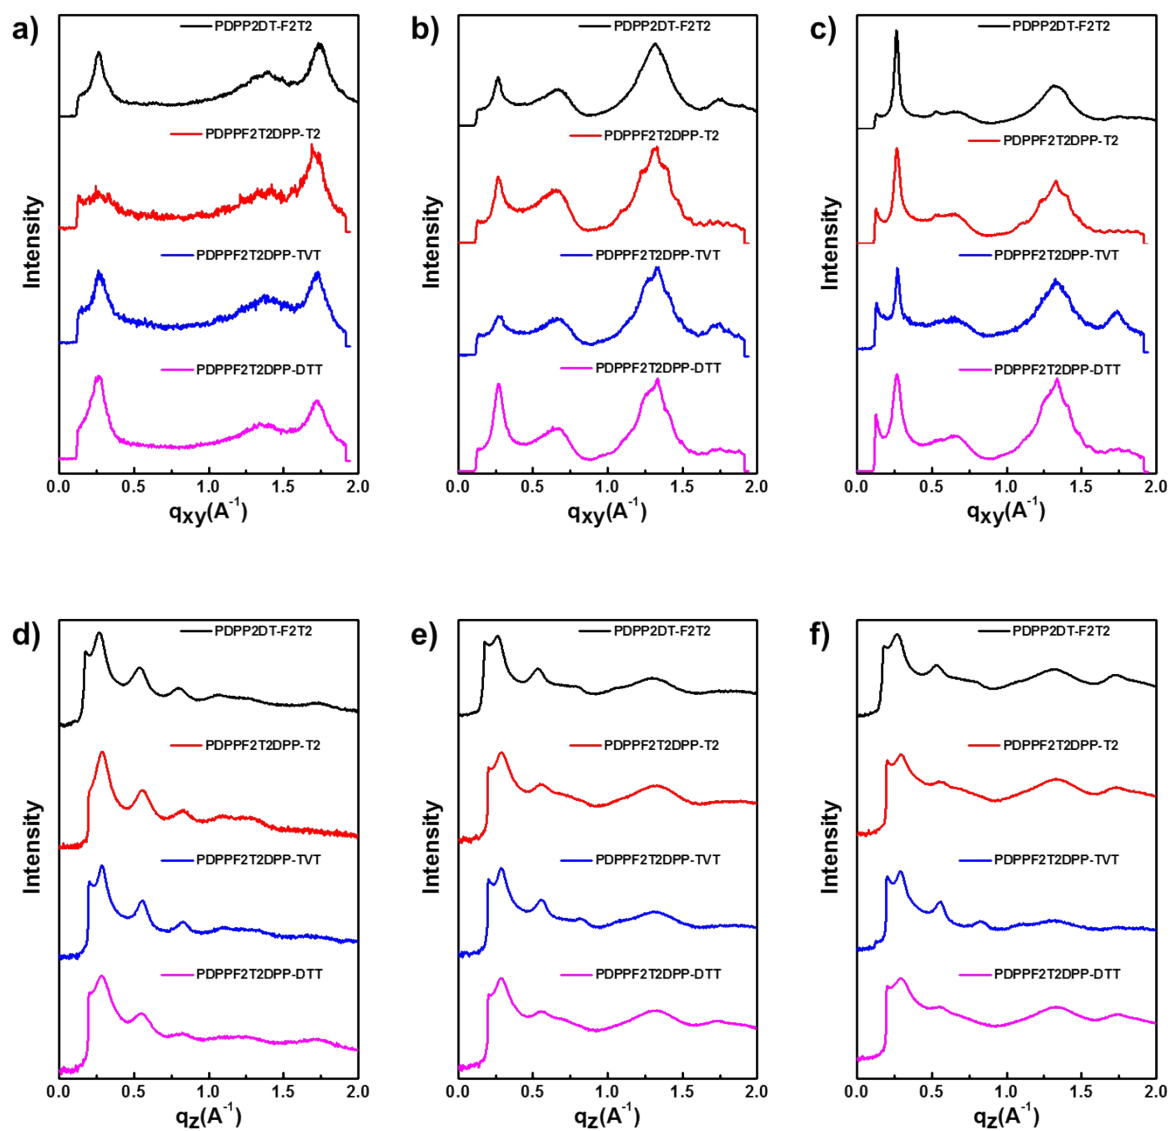

**Figure S15.** GIWAXS line-cut profiles of (a,d) pristine polymer films, (b,e) polymer:PC<sub>71</sub>BM blend films without DPE use, and (c,f) polymer:PC<sub>71</sub>BM blend films with DPE use; (a-c) in-plane profiles and (d-f) out-of-plane profiles)

**Table S2.** Packing parameters derived from GIWAXS patterns.

|                                            | Polymer         | Plane | Crystallographic parameters |                            |                         |                            |
|--------------------------------------------|-----------------|-------|-----------------------------|----------------------------|-------------------------|----------------------------|
|                                            |                 |       | Lamellar spacing            |                            | $\pi$ - $\pi$ stack     |                            |
|                                            |                 |       | q ( $\text{\AA}^{-1}$ )     | d-spacing ( $\text{\AA}$ ) | q ( $\text{\AA}^{-1}$ ) | d-spacing ( $\text{\AA}$ ) |
| Pristine polymer                           | PDPP2DT-F2T2    | In    | 0.262                       | 23.96                      | 1.73                    | 3.63                       |
|                                            |                 | Out   | 0.268                       | 23.43                      | 1.72                    | 3.65                       |
|                                            | PDPPF2T2DPP-T2  | In    | 0.275                       | 22.83                      | 1.73                    | 3.63                       |
|                                            |                 | Out   | 0.286                       | 21.95                      | -                       | -                          |
|                                            | PDPPF2T2DPP-TVT | In    | 0.263                       | 23.87                      | 1.73                    | 3.63                       |
|                                            |                 | Out   | 0.286                       | 21.95                      | 1.71                    | 3.67                       |
|                                            | PDPPF2T2DPP-DTT | In    | 0.263                       | 23.87                      | 1.73                    | 3.63                       |
|                                            |                 | Out   | 0.284                       | 22.11                      | 1.73                    | 3.63                       |
| Polymer:PC <sub>71</sub> BM Blend          | PDPP2DT-F2T2    | In    | 0.264                       | 23.78                      | 1.74                    | 3.60                       |
|                                            |                 | Out   | 0.264                       | 23.78                      | -                       | -                          |
|                                            | PDPPF2T2DPP-T2  | In    | 0.267                       | 23.52                      | -                       | -                          |
|                                            |                 | Out   | 0.290                       | 21.65                      | -                       | -                          |
|                                            | PDPPF2T2DPP-TVT | In    | 0.275                       | 22.83                      | 1.75                    | 3.58                       |
|                                            |                 | Out   | 0.290                       | 21.65                      | -                       | -                          |
|                                            | PDPPF2T2DPP-DTT | In    | 0.273                       | 23.00                      | -                       | -                          |
|                                            |                 | Out   | 0.286                       | 21.95                      | 1.72                    | 3.65                       |
| Polymer:PC <sub>71</sub> BM Blend with DPE | PDPP2DT-F2T2    | In    | 0.262                       | 23.96                      | 1.70                    | 3.69                       |
|                                            |                 | Out   | 0.268                       | 23.43                      | 1.72                    | 3.65                       |
|                                            | PDPPF2T2DPP-T2  | In    | 0.265                       | 23.69                      | -                       | -                          |
|                                            |                 | Out   | 0.296                       | 21.21                      | 1.75                    | 3.58                       |
|                                            | PDPPF2T2DPP-TVT | In    | 0.269                       | 23.34                      | 1.73                    | 3.63                       |
|                                            |                 | Out   | 0.290                       | 21.65                      | -                       | -                          |
|                                            | PDPPF2T2DPP-DTT | In    | 0.267                       | 23.52                      | -                       | -                          |
|                                            |                 | Out   | 0.296                       | 21.21                      | 1.75                    | 3.58                       |
